# Supplementary material for: Reversible and irreversible gas-particle partitioning of dicarbonyl compounds observed in the real atmosphere
Source: Copernicus journal article supplement (doi:10.5194/acp-2022-86), 2022-02-09
Supplement: Supplementary file 1 [file acp-2022-86-supplement.pdf]

## Supplement of:

### Reversible and irreversible gas-particle partitioning of dicarbonyl compounds observed in the real atmosphere.

Jingcheng Hu et al

5 Correspondence to: Zhongming Chen (zmchen@pku.edu.cn)

#### Temperature dependence of gas-particle partitioning coefficients

Previous studies(Qian et al., 2019; Shen et al., 2018; Cui et al., 2021; Odabasi and Seyfioglu, 2005) have confirmed that high temperature impaired the partitioning of dicarbonyls from gas-phase to particle-phase and a higher uptake coefficient was measured at a lower temperature(Gomez et al., 2015; Zhao et al., 2006). High temperature promote the volatilization and molecular velocities of dicarbonyls causing less dicarbonyls will remain in particles(Xu et al., 2020). What's more, low temperature and high humidity are conducive to hygroscopic aerosols growth and dicarbonyls could easily dissolve into hygroscopic aerosols during their growth(Mitsuishi et al., 2018).

#### The proposed thermodynamically favored mechanism for the reversible reactions in the aerosols of glyoxal and methylglyoxal

15 As shown in Fig. S5, upon hydration, a carbonyl group in glyoxal is protonated by  $H^+$ , and the  $sp^3$  oxygen of a hydroxyl group (acting as a nucleophile) in the hydrated glyoxal (A) attacks the protonated carbonyl to form a hemiacetal. The protonation and reaction of two hydrated glyoxals can also occur and form an acetal (D). Hemiacetal and acetal can mutually transform via hydration/dehydration, and both are likely to undergo further dehydration and intramolecular attack on the  $sp^2$  carbon, forming five-membered and six-membered dioxane ring dimers (C). Due to the lower barrier to formation, the dioxolane ring dimer (B) is the thermodynamic sink among all monomers and dimers, followed by open dimer species (D). The stable ring structure can react with additional hydrated glyoxal units followed by subsequent ring closure forming higher molecular-weight polymers (E), which is the endpoint of oligomerization due to kinetic barriers (Kua et al., 2008). Glyoxal cannot access the aldol condensation, because its two adjacent terminal aldehyde groups preclude the enol structure from forming (Barsanti and Pankow, 2005).

25 Other than glyoxal, both hydrate forms ( $A'$  &  $B'$ ) of methylglyoxal exist in solutions, and the nucleophilic attack at the aldehyde group is more favored compared to the ketone group. The acetal formation mechanism operates similarly for methylglyoxal in an acidic medium, forming stable ring systems. It should be noted that methylglyoxal can undergo aldol condensation due to its methyl ketone function, which is in equilibrium with the enol form by proton shift and tautomerization. The enol form

of methylglyoxal with the structure of  $\beta$ -hydroxy ketone is stabilized in an acidic medium through conjugation with the second  
 30 carbonyl group (Yasmeen et al., 2010) and can react with the hydrated methylglyoxal, resulting in aldol condensation. The  
 product of aldol condensation (D') is thermodynamically favored overall and can lead to subsequent oligomerization that  
 retains longer hydrocarbon chains. The products of these chains are more stable than those of hemiacetal formation (Krizner  
 et al., 2009).

### Mechanism for the reactions of glyoxal and methylglyoxal with OH radicals in the aqueous phase.

35 As illustrated in Fig. S6, the reaction of both glyoxal and methylglyoxal with OH radicals in the aqueous phase is initiated by  
 H-atom abstraction, followed by the addition of dissolved O<sub>2</sub> and peroxy-radicals formation. For glyoxal, the peroxy-radicals  
 mainly decompose to glyoxylic acid, which then undergo similar OH radical oxidation and ultimately form oxalic acid, while  
 other peroxy-radicals undergo RO<sub>2</sub>–RO<sub>2</sub> reactions to form formic acid. Similarly, in the case of methylglyoxal, the peroxy-  
 radicals mainly decompose to pyruvic acids and partly undergo RO<sub>2</sub>–RO<sub>2</sub> reactions to form acetic acids. Pyruvic acids could  
 40 be continuously oxidized to form oxalic acids or mesoxalic acids. The above chemical mechanism was proposed to explain  
 the OH radical oxidation in dilute solutions like fog and cloud water (Lim et al., 2013; Lim et al., 2010) and does not adequately  
 represent the aqueous chemistry in more concentrated solutions like wet aerosol.

### Irreversible uptake of glyoxal and methylglyoxal on aerosols

$$\gamma = \frac{d[X]_p/dt}{Z} \quad (S1)$$

$$45 \quad Z = \frac{1}{4} \omega S_{aw} [X]_g \quad (S2)$$

$$\omega = \sqrt{\frac{8RT}{\pi M_X}} \quad (S3)$$

$$S_{aw} = S_a \times f(RH) = S_a \times [1 + a(RH/100)^b] \quad (S4)$$

$$[X]_p = \int_0^t \frac{d[X]_p}{dt} dt \quad (S5)$$

where  $\gamma$  is the dimensionless irreversible uptake coefficient, which is calculated by field-measured data in this study; X is  
 50 carbonyl-glyoxal or methylglyoxal;  $[X]_p$  is the net uptake of gas-phase dicarbonyl on aerosols (molecules); t is the sampling  
 time; Z is the collision frequency between gas-phase dicarbonyl and the aerosols' surface (molecules·s<sup>-1</sup>);  $\omega$  is the average  
 movement rate of gas-phase dicarbonyl (m·s<sup>-1</sup>); S<sub>aw</sub> is the surface area of aerosols (m<sup>2</sup>); f(RH) is the dimensionless hygroscopic  
 factor; a and b are experience factors (a=8.8, b=9.7) (Liu et al., 2013);  $[X]_g$  is the concentration of gas-phase carbonyl  
 (molecules·m<sup>-3</sup>); M<sub>x</sub> is the average molar mass of gas-phase carbonyl (kg·mol<sup>-1</sup>); R is the ideal gas constant (8.314  
 55 Pa·m<sup>3</sup>·K<sup>-1</sup>·mol<sup>-1</sup>); and T is the actual temperature during the field measurement.

## Figure caption

**Table S1:** Summary of observation periods, sampling numbers, average values of meteorological parameters, concentrations of measured trace gases and PM<sub>2.5</sub> of five field observations in different seasons.

**Table S2:** Summary of reaction parameters of thermodynamically reversible reactions occur in the aerosol phase that are reported in the previous literature.

**Table S3:** Product distributions of thermodynamically reversible reaction for dicarbonyls in different seasons (%).

**Figure S1:** Correlations between PM<sub>2.5</sub> concentrations by weighing Teflon-based samples and those detected by a TEOM 1400A analyzer in the meteorological station.

**Figure S2:** Diurnal variations of glyoxal in gas-phase (a) and particle-phase (b) in different seasons.

**Figure S3:** Temperature dependence of  $K_p^f$  for glyoxal (a) and methylglyoxal (b).

**Figure S4:** Setschenow plot for glyoxal and methylglyoxal with sulfate (a), nitrate (b) and ammonia (c), assuming unit density for pure water.

**Figure S5:** The proposed thermodynamically favored mechanism for the thermodynamic reactions in the aerosols of glyoxal and methylglyoxal. The dark and blue characters indicated the glyoxal and methylglyoxal, respectively.

**Figure S6:** Mechanism for the reactions of glyoxal and methylglyoxal with OH radicals in the aqueous phase. The black characters represent dominant pathways, while the blue characters represent minor pathways.

**Figure S7:** The correlation-ship between oxalate concentrations measured by IC and those calculated by modeling coupled with full kinetic of glyoxal/methylglyoxal + OH.

**Figure S8:** Gas-particle partitioning process via irreversible uptake as a function of aerosol composition in different RH conditions.

## Reference

- Barsanti, K. C. and Pankow, J. F.: Thermodynamics of the formation of atmospheric organic particulate matter by accretion reactions—2. Dialdehydes, methylglyoxal, and diketones, *Atmospheric Environment*, 39, 6597-6607, 10.1016/j.atmosenv.2005.07.056, 2005.
- Betterton, E. A. and Hoffmann, M. R.: Kinetics, mechanism and thermodynamics of the reversible reaction of methylglyoxal (CH<sub>3</sub>COCHO) with sulfur(IV), *The Journal of Physical Chemistry*, 91, 3011-3020, 1987.
- Cui, J., Sun, M., Wang, L., Guo, J., Xie, G., Zhang, J., and Zhang, R.: Gas-particle partitioning of carbonyls and its influencing factors in the urban atmosphere of Zhengzhou, China, *Science of the Total Environment*, 751, 142027, 10.1016/j.scitotenv.2020.142027, 2021.
- Fratzke, A. R. and Reilly, P. J.: Thermodynamic and kinetic analysis of the dimerization of aqueous glyoxal, *International Journal of Chemical Kinetics*, 18, 775-789, 1986.
- Gomez, M. E., Lin, Y., Guo, S., and Zhang, R.: Heterogeneous chemistry of glyoxal on acidic solutions. An oligomerization pathway for secondary organic aerosol formation, *J Phys Chem A*, 119, 4457-4463, 10.1021/jp509916r, 2015.
- Jang and M.: Heterogeneous atmospheric aerosol production by acid-catalyzed particle-phase reactions, *Science*, 298, 814-817, 2002.
- Jessen, C. Q., Kollerup, F., Nielsen, K., Ovesen, H., and Sørensen, P.: The Hydration of Glyoxal and Methylglyoxal in Aqueous Solution, *Bulletin des Societes Chimiques Belges*, 91, 396-396, 1982.
- Krizner, H. E., Haan, D. D., and Kua, J.: Thermodynamics and kinetics of methylglyoxal dimer formation: a computational study, *Journal of Physical Chemistry A*, 113, 6994-7001, 2009.
- Kua, J., Hanley, S. W., and Haan, D. D.: Thermodynamics and Kinetics of Glyoxal Dimer Formation: A Computational Study, *The Journal of Physical Chemistry A*, 112, 66-72, 2008.
- Lim, Y. B., Tan, Y., and Turpin, B. J.: Chemical insights, explicit chemistry, and yields of secondary organic aerosol from OH radical oxidation of methylglyoxal and glyoxal in the aqueous phase, *Atmospheric Chemistry and Physics*, 13, 8651-8667, 10.5194/acp-13-8651-2013, 2013.
- Lim, Y. B., Tan, Y., Perri, M. J., Seitzinger, S. P., and Turpin, B. J.: Aqueous chemistry and its role in secondary organic aerosol (SOA) formation, *Atmospheric Chemistry and Physics*, 10, 10521-10539, 10.5194/acp-10-10521-2010, 2010.
- Liu, X., Gu, J., Li, Y., Cheng, Y., Yu, Q., Han, T., Wang, J., Tian, H., Jing, C., and Zhang, Y.: Increase of aerosol scattering by hygroscopic growth: Observation, modeling, and implications on visibility, *Atmospheric Research*, 132-133, 91-101, 2013.
- Mitsuishi, K., Iwasaki, M., Takeuchi, M., Okochi, H., Kato, S., Ohira, S.-I., and Toda, K.: Diurnal Variations in Partitioning of Atmospheric Glyoxal and Methylglyoxal between Gas and Particles at the Ground Level and in the Free Troposphere, *ACS Earth and Space Chemistry*, 2, 915-924, 10.1021/acsearthspacechem.8b00037, 2018.
- Odabasi, M. and Seyfioglu, R.: Phase partitioning of atmospheric formaldehyde in a suburban atmosphere, *Atmospheric Environment*, 39, 5149-5156, 10.1016/j.atmosenv.2005.05.006, 2005.
- Qian, X., Shen, H., and Chen, Z.: Characterizing summer and winter carbonyl compounds in Beijing atmosphere, *Atmospheric Environment*, 214, 10.1016/j.atmosenv.2019.116845, 2019.
- Shen, H., Chen, Z., Li, H., Qian, X., Qin, X., and Shi, W.: Gas-Particle Partitioning of Carbonyl Compounds in the Ambient Atmosphere, *Environmental Science & Technology*, 52, 10997-11006, 10.1021/acs.est.8b01882, 2018.
- Xu, R., Li, X., Dong, H., Wu, Z., Chen, S., Fang, X., Gao, J., Guo, S., Hu, M., Li, D., Liu, Y., Liu, Y., Lou, S., Lu, K., Meng, X., Wang, H., Zeng, L., Zong, T., Hu, J., Chen, M., Shao, M., and Zhang, Y.: Measurement of gaseous and particulate formaldehyde in the Yangtze River Delta, China, *Atmospheric Environment*, 224, 10.1016/j.atmosenv.2019.117114, 2020.
- Yasmeen, F., Sauret, N., Gal, J. F., Maria, P. C., Massi, L., Maenhaut, W., and Claeys, M.: Characterization of oligomers from methylglyoxal under dark conditions: a pathway to produce secondary organic aerosol through cloud processing during nighttime, *Atmospheric Chemistry and Physics*, 10, 2010.
- Zhao, J., Levitt, N. P., Zhang, R., and Chen, J.: Heterogeneous reactions of methylglyoxal in acidic media: implications for secondary organic aerosol formation, *Environmental Science & Technology*, 40, 7682-7687, 2006.

**Table S1:** Summary of observation periods, sampling numbers, average values of meteorological parameters, concentrations of measured trace gases and PM<sub>2.5</sub> of five field observations in different seasons.

|                                        | summer               | spring               | autumn               | winter               |                      |
|----------------------------------------|----------------------|----------------------|----------------------|----------------------|----------------------|
| periods                                | 2019.07.20-<br>08.04 | 2021.03.26-<br>04.06 | 2020.10.24-<br>11.07 | 2020.01.05-<br>01.19 | 2021.01.08-<br>01.26 |
| gas-phase                              | 77                   | 52                   | 79                   | 83                   | 96                   |
| particle-phase                         | 25                   | 19                   | 26                   | 28                   | 32                   |
| CO (ppmv)                              | 0.54                 | 0.46                 | 0.50                 | 0.73                 | 0.69                 |
| NO (ppbv)                              | 1.13                 | 4.43                 | 20.65                | 15.62                | 9.12                 |
| NO <sub>2</sub> (ppbv)                 | 14.24                | 15.89                | 14.67                | 22.50                | 16.94                |
| SO <sub>2</sub> (ppbv)                 | 0.096                | 1.36                 | 2.26                 | 2.98                 | 2.53                 |
| O <sub>3</sub> (ppbv)                  | 70.99                | 36.10                | 19.55                | 15.44                | 19.02                |
| PM <sub>2.5</sub> (µg/m <sup>3</sup> ) | 58.40                | 76.93                | 52.61                | 45.04                | 56.00                |
| T (K)                                  | 301.14               | 289.44               | 287.20               | 273.85               | 273.48               |
| RH (%)                                 | 67.41                | 29.66                | 23.99                | 31.03                | 30.16                |
| WS (m/s)                               | 1.93                 | 2.83                 | 2.55                 | 2.21                 | 2.78                 |

**Table S2:** Summery of reaction parameters of thermodynamically reversible reactions occur in the aerosol phase that are reported in the previous literature.

| Dicarbonyl    | Reaction       | Equilibrium<br>constant | Rate constant<br>forward k/backward k'                                                                  | Reference                    |
|---------------|----------------|-------------------------|---------------------------------------------------------------------------------------------------------|------------------------------|
| Glyoxal       | Hydration      |                         |                                                                                                         | Wasa and Musha, 1970         |
|               | Hydr1          | 350                     | $k=7\text{ s}^{-1}$ ; $k'=0.02\text{ s}^{-1}$                                                           | Betterton and Hoffmann, 1988 |
|               | Hydr2          | 207                     | $k=4\text{ s}^{-1}$ ; $k'=0.02\text{ s}^{-1}$                                                           | Ip et al., 2009              |
|               | Dimerization   | $0.56\text{ M}^{-1}$    | $k=10^{-4}\text{ M}^{-1}\cdot\text{s}^{-1}$ ;<br>$k'=1.8\times 10^{-4}\text{ M}^{-1}\cdot\text{s}^{-1}$ | Fratzke and Reilly,1986      |
|               | Trimerization  | 1000                    | $k=100\text{ M}^{-1}\cdot\text{s}^{-1}$ ;                                                               | Volkamer, 2009               |
|               |                |                         | $k'=0.1\text{ M}^{-1}\cdot\text{s}^{-1}$                                                                | Volkamer, 2010               |
| Methylglyoxal | Hydration      |                         |                                                                                                         | Jessen, 1982                 |
|               | Hydr1          | 2700                    | $k=35\text{ s}^{-1}$ ; $k'=0.013\text{ s}^{-1}$                                                         | Betterton and Hoffmann, 1987 |
|               | Hydr2          | 0.24                    | $k=0.0048\text{ s}^{-1}$ ; $k'=0.02\text{ s}^{-1}$                                                      | Matthew J. Elrod, 2021       |
|               | Polymerization | 1000                    | $k=100\text{ M}^{-1}\cdot\text{s}^{-1}$ ;<br>$k'=0.1\text{ M}^{-1}\cdot\text{s}^{-1}$                   | The same as glyoxal          |

**Table S3:** Product distributions of thermodynamically reversible formation for glyoxal and methylglyoxal in aerosol liquid water in different seasons (%).

| Season  | Glyoxal  |           | Methylglyoxal |           |
|---------|----------|-----------|---------------|-----------|
|         | Hydrates | Oligomers | Hydrates      | Oligomers |
| Summer  | 52.80    | 47.30     | 35.10         | 64.98     |
| Autumn  | 19.00    | 79.75     | 20.30         | 77.35     |
| Spring  | 14.64    | 85.43     | 21.03         | 78.97     |
| Winter  | 13.92    | 86.15     | 18.78         | 86.31     |
| General | 16.3     | 83.5      | 20.8          | 80.8      |

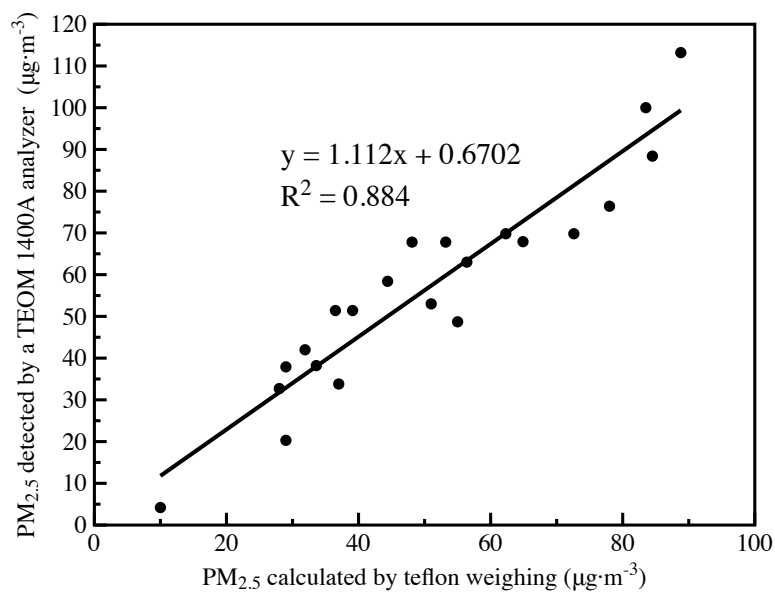

**Figure S1:** Correlations between PM<sub>2.5</sub> concentrations by weighing Teflon-based samples and those detected by a TEOM 1400A analyzer in the meteorological station.



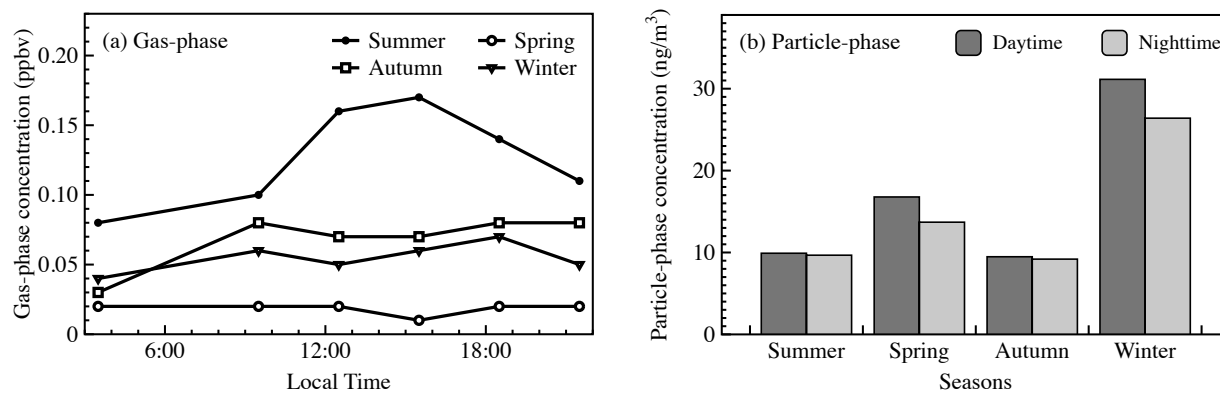

**Figure S2:** Diurnal variations of glyoxal in gas-phase (a) and particle-phase (b) in different seasons.

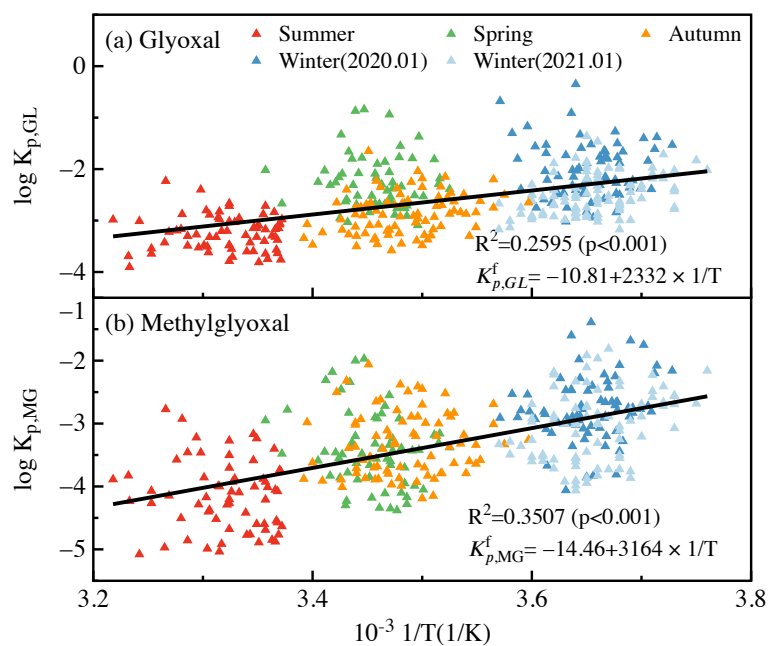

145 **Figure S3:** Temperature dependence of  $K_p^f$  for glyoxal (a) and methylglyoxal (b). Colors represent different seasons.

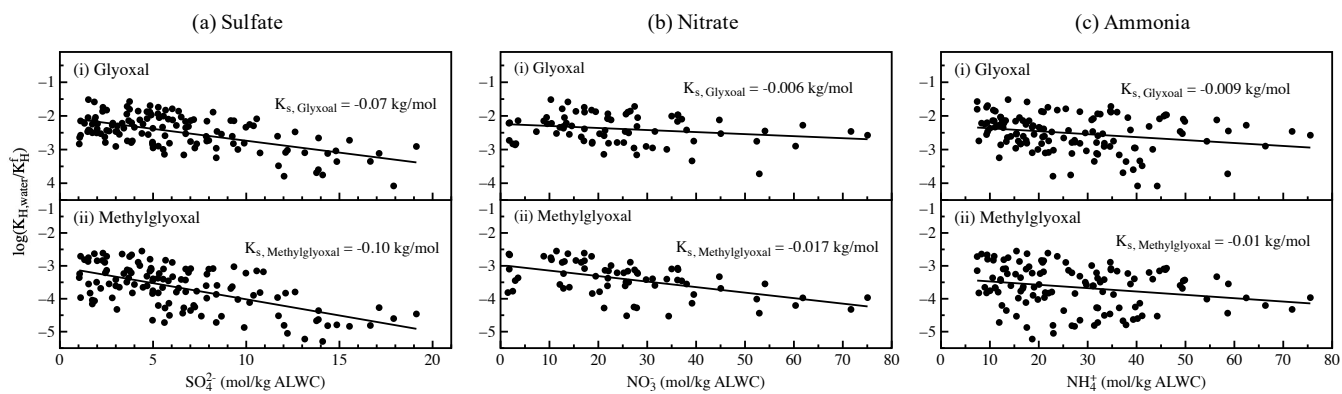

**Figure S4:** Setschenow plot for glyoxal and methylglyoxal with sulfate (a), nitrate (b) and ammonia (c), assuming unit density for pure water.

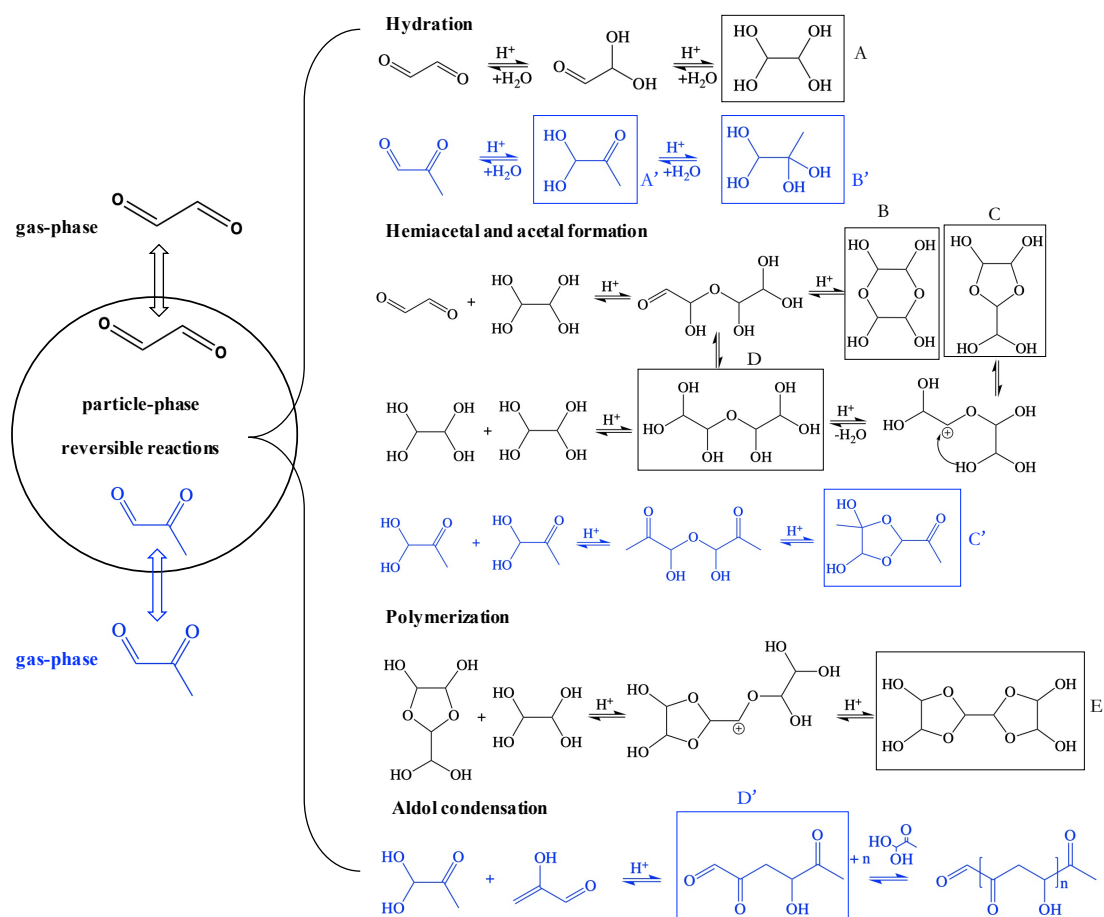

**Figure S5:** The proposed thermodynamically favored mechanism for the thermodynamic reactions in the aerosols of glyoxal and methylglyoxal. The dark and blue characters indicated the glyoxal and methylglyoxal, respectively. The figure was

## Glyoxal + OH mechanisms

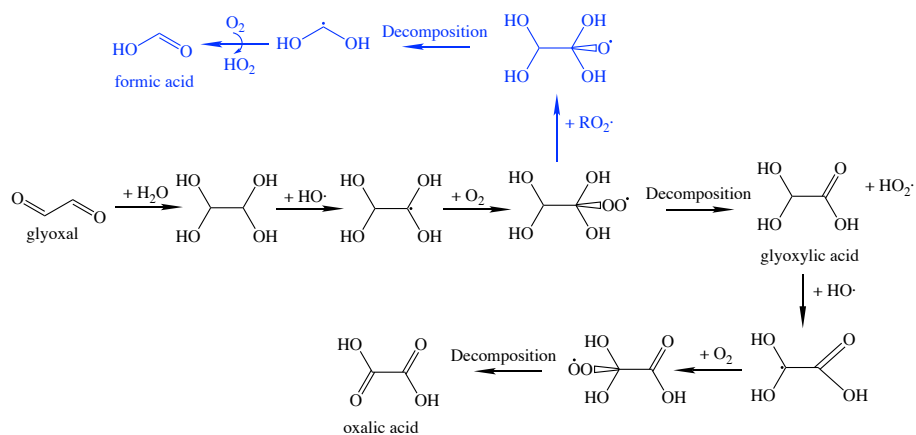

## Methylglyoxal + OH mechanisms

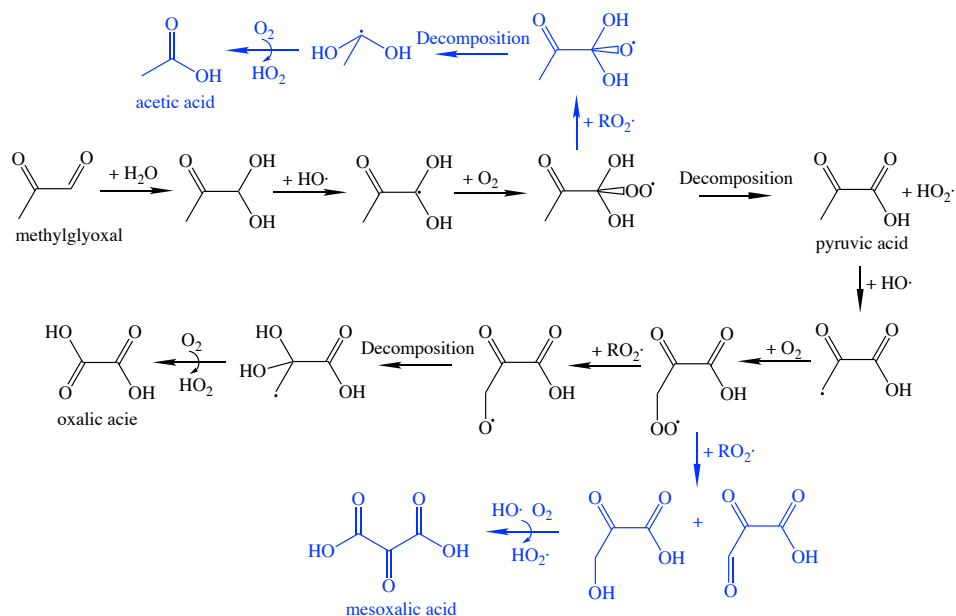

**Figure S6:** Mechanism for the reactions of glyoxal and methylglyoxal with OH radicals in the aqueous phase. The black characters represent dominant pathways, while the blue characters represent minor pathways.

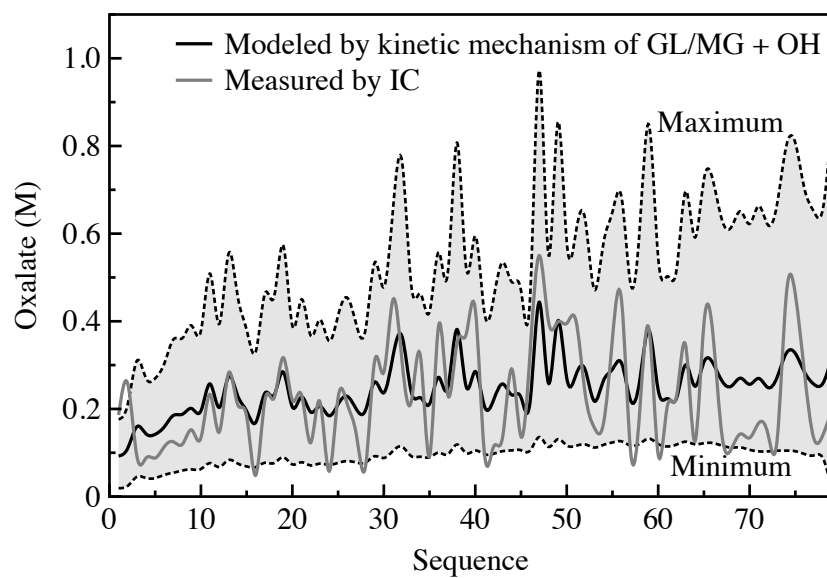

**Figure S7:** The correlation between oxalate concentrations measured by ion chromatography (gray lines) and those calculated by modeling coupled with the full kinetic of glyoxal/methylglyoxal + OH (black lines).

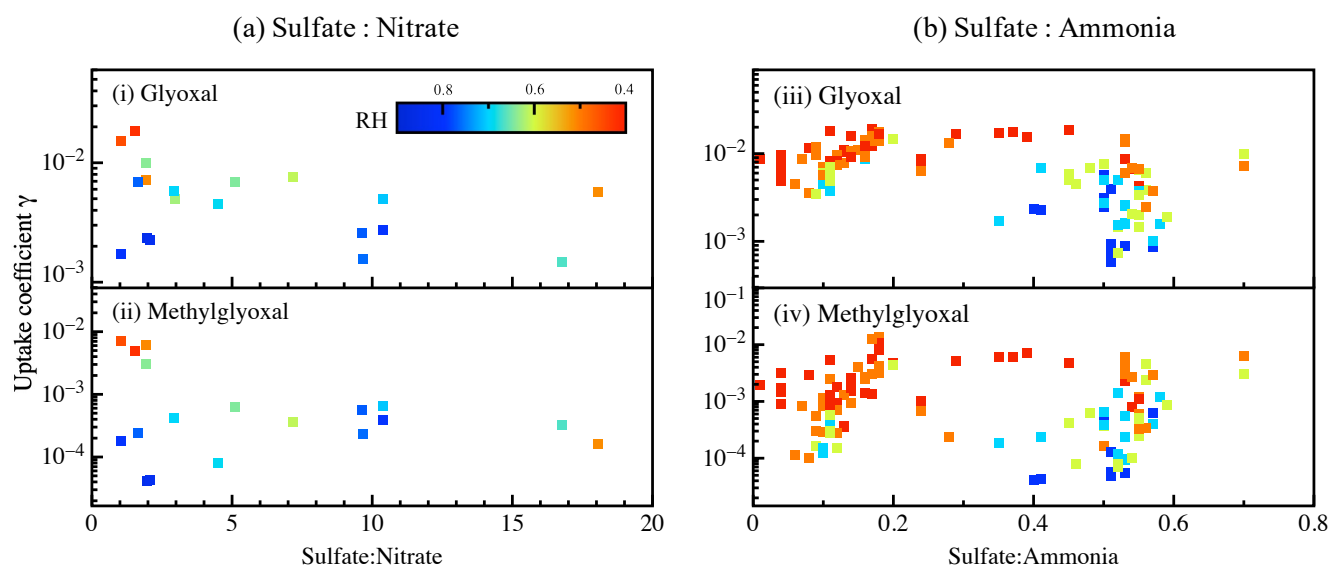

165 **Figure S7:** Gas-particle partitioning process via irreversible uptake as a function of aerosol composition in different RH conditions.
